# Supplementary material
Source: Springer Nature journal article supplement (https://www.springermedizin.de/resource/supplementary/12974_2011_441_MOESM3_ESM.pdf/9601278)

**A. BV-2**      **3 cyt**

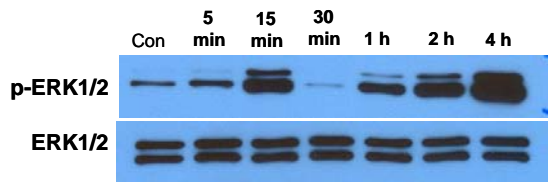

**B. BV-2**      **LPS+IFN $\gamma$**

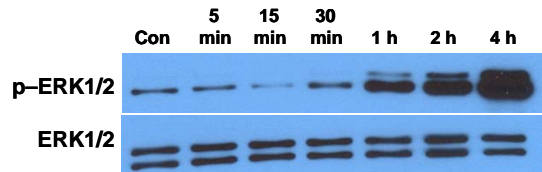

**C. DITNC**      **3 cyt**

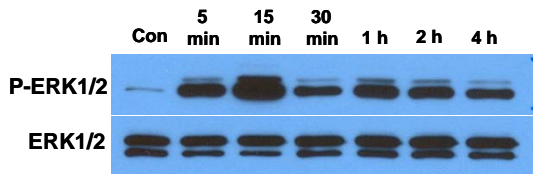

**D. DITNC**      **LPS+IFN $\gamma$**

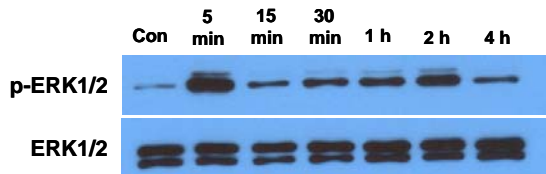

Supplement: MOESM3 [file 9601278]
